# Supplementary material
Source: publisher site journal article supplement (http://www.spandidos-publications.com/1664/downloadSupplementary)
Supplement: Supplementary file 1 [file downloadSupplementary]

## Sheet: Canonical_Pathway
Table SIV. Canonical pathways enriched By IPA analysis.
Ingenuity Caninical Pathways	-Log(P-values)	Ration	Z-Score	Molecules
SUPERPATHWAY OF CHOLESTEROL BIOSYNTHESIS	17.5	6.07x10-1	NAN	MVD,SQLE,NSDHL,PMVK,IDI1,MVK,HSD17B7,MSMO1,TM7SF2,SC5D,LBR,FDPS,FDFT1,DHCR7,LSS,HMGCR,CYP51A1
CHOLESTEROL BIOSYNTHESIS	14.1	8.46x10-1	NAN	FDFT1,SQLE,DHCR7,NSDHL,HSD17B7,MSMO1,LSS,TM7SF2,SC5D,CYP51A1,LBR
ZYMOSTEROL BIOSYNTHESIS	8.7	1.00x100	NAN	NSDHL,HSD17B7,MSMO1,TM7SF2,CYP51A1,LBR
SUPERPATHWAY OF GERANYLGERANYLDIPHOSPHATE BIOSYNTHESIS I (VIA MEVALONATE)	4.76	3.53x10-1	NAN	MVD,FDPS,PMVK,IDI1,MVK,HMGCR
MEVALONATE PATHWAY I	4.24	3.85x10-1	NAN	MVD,PMVK,IDI1,MVK,HMGCR
ROLE OF JAK2 IN HORMONE-LIKE CYTOKINE SIGNALING	3.79	2.06x10-1	NAN	SHC1,SOCS3,IRS2,JAK2,STAT3,STAT1,SOCS7
ROLE OF JAK FAMILY KINASES IN IL-6-TYPE CYTOKINE SIGNALING	3.71	2.40x10-1	NAN	IL6ST,SOCS3,MAPK3,JAK2,STAT3,STAT1
GLUCOCORTICOID RECEPTOR SIGNALING	3.56	7.99x10-2	NAN	PBRM1,VCAM1,TAF6,SGK1,HSPA1A/HSPA1B,JAK2,STAT3,SMARCA4,TRAF6,PIK3R3,SHC1,HSPA4,NFAT5,DUSP1,SMARCA2,MAPK3,CDKN1A,TGFB2,IRS2,SMARCC2,SERPINE1,STAT1,ELK1
GERM CELL-SERTOLI CELL JUNCTION SIGNALING	3.33	9.25x10-2	NAN	ITGB1,PXN,CFL1,CTNNA1,ITGA6,GSN,PIK3R3,ITGA3,RND3,TUBA8,TUBB6,MAPK3,TGFB2,ZYX,IRS2,ACTN1
REMODELING OF EPITHELIAL ADHERENS JUNCTIONS	3.14	1.30x10-1	NAN	ACTR3,RALA,RAB5C,TUBB6,TUBA8,CTNNA1,ZYX,MAPRE3,ACTN1
AXONAL GUIDANCE SIGNALING	3.07	6.64x10-2	NAN	WAsl,UNC5B,CXCL12,PLXNA2,SHC1,ITGA3,NFAT5,ACTR3,TUBA8,MAPK3,PRKAR1B,ADAM19,PLXNB2,IRS2,MMP11,RASA1,GNG12,PRKCA,ITGB1,EPHB4,PXN,CFL1,NRP2,MYLPF,PIK3R3,SDCBP,MAG,TUBB6,RTN4,ADAM10
ROLE OF JAK1 AND JAK3 IN γC CYTOKINE SIGNALING	3.05	1.27x10-1	NAN	PIK3R3,SHC1,STAT6,SOCS3,MAPK3,IRS2,JAK2,STAT3,STAT1
MOLECULAR MECHANISMS OF CANCER	2.99	6.91x10-2	NAN	RALA,SUV39H1,CTNNA1,JAK2,CCND1,SHC1,ITGA3,MAPK3,PRKAR1B,TGFB2,IRS2,HIPK2,RASA1,PRKCA,ITGB1,HAT1,SMAD6,RALBP1,NBN,PIK3R3,CBL,CCND2,RND3,CDKN1A,ELK1,BCL2L11
EPOXYSQUALENE BIOSYNTHESIS	2.9	1.00x100	NAN	FDFT1,SQLE
CARDIOLIPIN BIOSYNTHESIS II	2.9	1.00x100	NAN	PTPMT1,PGS1
RAR ACTIVATION	2.89	8.42x10-2	NAN	PBRM1,AKR1C3,NR2F2,SMAD6,DHRS7C,JAK2,SMARCA4,PIK3R3,CSNK2A2,DUSP1,SMARCA2,PRKAR1B,TGFB2,SMARCC2,SCAND1,PRKCA
ERYTHROPOIETIN SIGNALING	2.64	1.11x10-1	NAN	PIK3R3,SHC1,SOCS3,CBL,MAPK3,IRS2,JAK2,ELK1,PRKCA
GADD45 SIGNALING	2.4	2.11x10-1	NAN	CCND2,CDKN1A,CCND1,CCNB1
ROLE OF TISSUE FACTOR IN CANCER	2.35	8.94x10-2	NAN	ITGB1,PIK3R3,YES1,ITGA3,CFL1,MAPK3,ITGA6,IRS2,JAK2,CYR61,PRKCA
IL-15 SIGNALING	2.26	1.05x10-1	NAN	PIK3R3,SHC1,STAT6,VCAM1,MAPK3,IRS2,JAK2,STAT3
HEPATIC FIBROSIS / HEPATIC STELLATE CELL ACTIVATION	2.23	7.65x10-2	NAN	VCAM1,COL4A1,KLF6,Flt1,IGFBP5,COL4A2,COL6A3,TGFB2,CD14,ECE1,SERPINE1,STAT1,IFNAR1,TNFRSF11B
CLEAVAGE AND POLYADENYLATION OF PRE-MRNA	2.11	2.50x10-1	NAN	PAPOLA,PABPN1,CSTF3
ROLE OF JAK1, JAK2 AND TYK2 IN INTERFERON SIGNALING	2.02	1.67x10-1	NAN	JAK2,STAT3,STAT1,IFNAR1
OLEATE BIOSYNTHESIS II (ANIMALS)	2.01	2.31x10-1	NAN	SCD,SCD2,FADS1
VIRUS ENTRY VIA ENDOCYTIC PATHWAYS	1.98	8.82x10-2	NAN	ITGB1,PIK3R3,ITGA3,FLNA,ITGA6,IRS2,AP1B1,CXADR,PRKCA
SERINE BIOSYNTHESIS	1.93	4.00x10-1	NAN	PSAT1,PHGDH
TRANS, TRANS-FARNESYL DIPHOSPHATE BIOSYNTHESIS	1.93	4.00x10-1	NAN	FDPS,IDI1
ESTROGEN BIOSYNTHESIS	1.92	1.28x10-1	NAN	AKR1C3,HSD17B7,HSD17B12,CYP1B1,CYP51A1
TRNA CHARGING	1.92	1.28x10-1	NAN	NARS,QArs,KARS,MARS,EPRS
INHIBITION OF MATRIX METALLOPROTEASES	1.92	1.28x10-1	NAN	TIMP3,SDC1,MMP14,ADAM10,MMP11
CAVEOLAR-MEDIATED ENDOCYTOSIS SIGNALING	1.89	9.86x10-2	NAN	ITGB1,ITGA3,RAB5C,ITGA11,FLNA,ITGA6,PRKCA
UNFOLDED PROTEIN RESPONSE	1.88	1.09x10-1	NAN	HSPA4,INSIG1,MBTPS1,HSPA1A/HSPA1B,CD82,AMFR
THYROID CANCER SIGNALING	1.88	1.25x10-1	NAN	SHC1,MAPK3,CXCL12,TCF7L1,CCND1
HEREDITARY BREAST CANCER SIGNALING	1.85	7.64x10-2	NAN	PBRM1,PIK3R3,SMARCA2,CDKN1A,HDAC1l,SMARCC2,IRS2,CCND1,SMARCA4,NBN,CCNB1
ROLE OF OSTEOBLASTS, OSTEOCLASTS AND CHONDROCYTES IN RHEUMATOID ARTHRITIS	1.7	6.44x10-2	NAN	ITGB1,SPP1,MMP14,SMAD6,TCF7L1,GSN,TRAF6,PIK3R3,IL33,ITGA3,CBL,NFAT5,MAPK3,IRS2,TNFRSF11B
ROLE OF BRCA1 IN DNA DAMAGE RESPONSE	1.68	8.97x10-2	NAN	PBRM1,SMARCA2,CDKN1A,SMARCC2,STAT1,SMARCA4,NBN
TR/RXR ACTIVATION	1.63	8.16x10-2	NAN	PIK3R3,LDLR,UCP2,COL6A3,AKR1C3,FASN,CYP7A1,IRS2
SUPERPATHWAY OF SERINE AND GLYCINE BIOSYNTHESIS I	1.63	2.86x10-1	NAN	PSAT1,PHGDH
CTLA4 SIGNALING IN CYTOTOXIC T LYMPHOCYTES	1.6	8.08x10-2	NAN	PIK3R3,AP1S1,CD28,AP1M1,PPM1L,IRS2,AP1B1,JAK2
FAK SIGNALING	1.6	8.08x10-2	NAN	ITGB1,PIK3R3,PXN,ITGA3,TLN2,MAPK3,HMMR,IRS2
SERTOLI CELL-SERTOLI CELL JUNCTION SIGNALING	1.59	6.74x10-2	NAN	MPP6,ITGB1,SPTBN1,ITGA3,CLDN15,TUBB6,TUBA8,MAPK3,PRKAR1B,CTNNA1,ELK1,ACTN1
ENDOMETRIAL CANCER SIGNALING	1.59	9.38x10-2	NAN	PIK3R3,MAPK3,CTNNA1,IRS2,ELK1,CCND1
CLATHRIN-MEDIATED ENDOCYTOSIS SIGNALING	1.58	6.53x10-2	NAN	ITGB1,PIK3R3,CSNK2A2,LDLR,RAB5C,ACTR3,CBL,GAK,DAB2,IRS2,AP1B1,CLU,APOD
GRANULOCYTE ADHESION AND DIAPEDESIS	1.57	6.70x10-2	NAN	IL33,ITGB1,VCAM1,ITGA3,SDC1,CLDN15,MMP14,ITGA6,CXCL12,MMP11,CXCL2,TNFRSF11B
PYRIDOXAL 5'-PHOSPHATE SALVAGE PATHWAY	1.56	9.23x10-2	NAN	PRKX,SGK1,MAPK3,GRK6,TTK,DYRK1A
ROLE OF MACROPHAGES, FIBROBLASTS AND ENDOTHELIAL CELLS IN RHEUMATOID ARTHRITIS	1.52	5.79x10-2	NAN	IL6ST,SOCS3,VCAM1,DAAM1,CXCL12,JAK2,TCF7L1,STAT3,CREB5,CCND1,TRAF6,IL33,PIK3R3,NFAT5,MAPK3,IRS2,TNFRSF11B,PRKCA
CHRONIC MYELOID LEUKEMIA SIGNALING	1.49	7.69x10-2	NAN	PIK3R3,MAPK3,SUV39H1,CDKN1A,TGFB2,HDAC1l,IRS2,CCND1
TH1 AND TH2 ACTIVATION PATHWAY	1.48	6.49x10-2	NAN	IL33,PIK3R3,STAT6,SOCS3,CD28,NOTCH2,IRS2,JAK2,STAT3,JAG1,STAT1,IFNAR1
ACYL CARRIER PROTEIN METABOLISM	1.45	1.00x100	NAN	AASDHPPT
GLUTAMATE REMOVAL FROM FOLATES	1.45	1.00x100	NAN	GGH
ASPARAGINE BIOSYNTHESIS I	1.45	1.00x100	NAN	ASNS
LANOSTEROL BIOSYNTHESIS	1.45	1.00x100	NAN	LSS
IL-10 SIGNALING	1.45	8.70x10-2	NAN	TRAF6,IL33,SOCS3,CD14,STAT3,ELK1
IL-12 SIGNALING AND PRODUCTION IN MACROPHAGES	1.44	6.85x10-2	NAN	TRAF6,PIK3R3,STAT6,MAPK3,TGFB2,IRS2,STAT1,CLU,APOD,PRKCA
EPITHELIAL ADHERENS JUNCTION SIGNALING	1.44	6.85x10-2	NAN	NOTCH2,YES1,ACTR3,TUBB6,TUBA8,TGFB2,CTNNA1,ZYX,TCF7L1,ACTN1
IL-4 SIGNALING	1.41	7.87x10-2	NAN	PIK3R3,SHC1,STAT6,NFAT5,INPPL1,IRS2,JAK2
SEMAPHORIN SIGNALING IN NEURONS	1.4	9.43x10-2	NAN	ITGB1,RND3,CFL1,DPYSL3,MAPK3
T CELL RECEPTOR SIGNALING	1.39	7.34x10-2	NAN	PIK3R3,CD28,CBL,NFAT5,MAPK3,IRS2,ELK1,RASA1
T HELPER CELL DIFFERENTIATION	1.34	8.22x10-2	NAN	IL6ST,STAT6,CD28,STAT3,STAT1,TNFRSF11B
MELANOMA SIGNALING	1.34	9.09x10-2	NAN	PIK3R3,MAPK3,CDKN1A,IRS2,CCND1
REELIN SIGNALING IN NEURONS	1.34	7.61x10-2	NAN	ITGB1,PIK3R3,YES1,ITGA3,MAPK8IP2,ITGA6,IRS2
PROTEIN UBIQUITINATION PATHWAY	1.28	5.66x10-2	NAN	PSMB4,DNAJB12,HSPA1A/HSPA1B,UBE2T,UCHL3,TRAF6,USP7,HSPA4,CBL,UBE2H,UBE2B,HSPB11,UBA1,USP40,AMFR
PROSTATE CANCER SIGNALING	1.26	7.29x10-2	NAN	PIK3R3,MAPK3,SUV39H1,CDKN1A,IRS2,CREB5,CCND1
HEPATIC CHOLESTASIS	1.22	6.25x10-2	NAN	TRAF6,IL33,SLC4A2,ABCC1,CYP7A1,PRKAR1B,TGFB2,CD14,PRKCA,TNFRSF11B
PHOSPHATIDYLGLYCEROL BIOSYNTHESIS II (NON-PLASTIDIC)	1.2	1.15x10-1	NAN	AGPAT5,PTPMT1,PGS1
GUANINE AND GUANOSINE SALVAGE I	1.16	5.00x10-1	NAN	HPRT1
SPERMINE BIOSYNTHESIS	1.16	5.00x10-1	NAN	SMS
FLAVIN BIOSYNTHESIS IV (MAMMALIAN)	1.16	5.00x10-1	NAN	RFK
PALMITATE BIOSYNTHESIS I (ANIMALS)	1.16	5.00x10-1	NAN	FASN
FATTY ACID BIOSYNTHESIS INITIATION II	1.16	5.00x10-1	NAN	FASN
PHAGOSOME FORMATION	1.14	6.50x10-2	NAN	ITGB1,PIK3R3,ITGA3,RND3,SCARA3,INPPL1,IRS2,PRKCA
REGULATION OF THE EPITHELIAL-MESENCHYMAL TRANSITION PATHWAY	1.12	5.82x10-2	NAN	PIK3R3,NOTCH2,ID2,MAPK3,TGFB2,IRS2,TCF7L1,ZEB1,JAK2,STAT3,JAG1
BILE ACID BIOSYNTHESIS, NEUTRAL PATHWAY	1.12	1.54x10-1	NAN	AKR1C3,CYP7A1
GUANOSINE NUCLEOTIDES DEGRADATION III	1.12	1.54x10-1	NAN	xDH,AOx1
ROLE OF OCT4 IN MAMMALIAN EMBRYONIC STEM CELL PLURIPOTENCY	1.1	8.70x10-2	NAN	KDM5B,SPP1,ETS2,NR2F2
FXR/RXR ACTIVATION	1.09	6.35x10-2	NAN	IL33,SDC1,SLC4A2,FASN,CYP7A1,SERPINF1,CLU,APOD
IL-17 SIGNALING	1.09	7.06x10-2	NAN	TRAF6,PIK3R3,MAPK3,IRS2,JAK2,ELK1
UVB-INDUCED MAPK SIGNALING	1.07	7.58x10-2	NAN	PIK3R3,MAPK3,IRS2,EIF4EBP1,PRKCA
ISOLEUCINE DEGRADATION I	1.06	1.43x10-1	NAN	AUH,ACAD8
URATE BIOSYNTHESIS/INOSINE 5'-PHOSPHATE DEGRADATION	1.06	1.43x10-1	NAN	XDH,AOX1
SONIC HEDGEHOG SIGNALING	1.05	1.00x10-1	NAN	PRKAR1B,CCNB1,DYRK1A
CCR3 SIGNALING IN EOSINOPHILS	1.03	6.15x10-2	NAN	PIK3R3,CFL1,Ppp1r12A,MAPK3,IRS2,PLA2G2A,GNG12,PRKCA
BLADDER CANCER SIGNALING	1.03	6.82x10-2	NAN	MMP14,MAPK3,SUV39H1,CDKN1A,MMP11,CCND1
HER-2 SIGNALING IN BREAST CANCER	1.03	6.82x10-2	NAN	ITGB1,PIK3R3,CDKN1A,IRS2,CCND1,PRKCA
CANCER DRUG RESISTANCE BY DRUG EFFLUX	1.02	8.16x10-2	NAN	PIK3R3,FOXO4,MAPK3,ABCC1
GLUTATHIONE-MEDIATED DETOXIFICATION	1.01	9.68x10-2	NAN	GSTM3,GGH,GstA4
TELOMERE EXTENSION BY TELOMERASE	1.01	1.33x10-1	NAN	TNKS2,NBN
OXIDIZED GTP AND DGTP DETOXIFICATION	0.987	3.33x10-1	NAN	DDX6
SYSTEMIC LUPUS ERYTHEMATOSUS SIGNALING	0.97	5.33x10-2	NAN	IL33,PIK3R3,SNRNP48,CD28,LSM6,CBL,NFAT5,MAPK3,PRPF40A,IRS2,SNRPD3,SNRPA1
BREAST CANCER REGULATION BY STATHMIN1	0.959	5.42x10-2	NAN	PIK3R3,SHC1,TUBB6,TUBA8,MAPK3,CDKN1A,PPM1L,PRKAR1B,IRS2,GNG12,PRKCA
ADENOSINE NUCLEOTIDES DEGRADATION II	0.917	1.18x10-1	NAN	XDH,AOX1
SALVAGE PATHWAYS OF PYRIMIDINE RIBONUCLEOTIDES	0.911	6.32x10-2	NAN	PRKX,SGK1,MAPK3,GRK6,TTK,DYRK1A
NICOTINE DEGRADATION III	0.902	7.41x10-2	NAN	LArGE1,AOX1,CYP1B1,CYP51A1
CELL CYCLE REGULATION BY BTG FAMILY PROTEINS	0.896	8.57x10-2	NAN	PPM1L,BTG1,CCND1
MIF-MEDIATED GLUCOCORTICOID REGULATION	0.896	8.57X10-2	NAN	MAPK3,CD14,PLA2G2A
SUPERPATHWAY OF INOSITOL PHOSPHATE COMPOUNDS	0.881	5.13x10-2	NAN	PIK3R3,SOCS3,CD28,PIP5K1A,TNS3,DUSP1,INPPL1,IRS2,INPP5A,NUDT4,PPP4C,RASA1
VALINE DEGRADATION I	0.876	1.11x10-1	NAN	AUH,ACAD8
D-MYO-INOSITOL (1,4,5)-TRISPHOSPHATE DEGRADATION	0.876	1.11x10-1	NAN	INPPL1,INPP5A
PENTOSE PHOSPHATE PATHWAY (OXIDATIVE BRANCH)	0.87	2.50x10-1	NAN	PGD
METHYLMALONYL PATHWAY	0.87	2.50x10-1	NAN	PCCA
GERANYLGERANYLDIPHOSPHATE BIOSYNTHESIS	0.87	2.50x10-1	NAN	FDPS
PROLINE BIOSYNTHESIS I	0.87	2.50x10-1	NAN	PYCR1
ACETATE CONVERSION TO ACETYL-COA	0.87	2.50x10-1	NAN	ACSS2
ERBB SIGNALING	0.865	6.12x10-2	NAN	PIK3R3,SHC1,MAPK3,IRS2,ELK1,PRKCA
CDK5 SIGNALING	0.85	6.06x10-2	NAN	ITGB1,ITGA3,MAPK3,PPM1L,PRKAR1B,ITGA6
OVARIAN CANCER SIGNALING	0.848	5.56x10-2	NAN	PIK3R3,MAPK3,SUV39H1,CD44,PRKAR1B,IRS2,TCF7L1,CCND1
TIGHT JUNCTION SIGNALING	0.848	5.39x10-2	NAN	CLDN15,PPM1L,MARK2,PRKAR1B,TGFB2,CTNNA1,SAFB,CSTF3,TNFRSF11B
COMPLEMENT SYSTEM	0.843	8.11x10-2	NAN	C1R,C1S,CFH
AGRANULOCYTE ADHESION AND DIAPEDESIS	0.84	5.24x10-2	NAN	IL33,ITGB1,VCAM1,ITGA3,CLDN15,MMP14,ITGA6,CXCL12,MMP11,CXCL2
1D-MYO-INOSITOL HEXAKISPHOSPHATE BIOSYNTHESIS II (MAMMALIAN)	0.838	1.05x10-1	NAN	INPPL1,INPP5A
D-MYO-INOSITOL (1,3,4)-TRISPHOSPHATE BIOSYNTHESIS	0.838	1.05x10-1	NAN	INPPL1,INPP5A
ROLE OF NFAT IN CARDIAC HYPERTROPHY	0.82	5.18x10-2	NAN	IL6ST,PIK3R3,SHC1,MAPK3,PRKAR1B,TGFB2,HDAC1l,IRS2,GNG12,PRKCA
NOTCH SIGNALING	0.818	7.89x10-2	NAN	NOTCH2,MAG,JAG1
REGULATION OF IL-2 EXPRESSION IN ACTIVATED AND ANERGIC T LYMPHOCYTES	0.807	6.25x10-2	NAN	CD28,NFAT5,MAPK3,TGFB2,ELK1
GAP JUNCTION SIGNALING	0.805	5.26x10-2	NAN	PIK3R3,DBN1,TUBB6,TUBA8,MAPK3,CSNK1G3,PRKAR1B,IRS2,PRKCA
PURINE NUCLEOTIDES DEGRADATION II (AEROBIC)	0.802	1.00x10-1	NAN	XDH,AOX1
APRIL MEDIATED SIGNALING	0.794	7.69x10-2	NAN	TRAF6,NFAT5,ELK1
NETRIN SIGNALING	0.794	7.69x10-2	NAN	NFAT5,UNC5B,PRKAR1B
MACROPINOCYTOSIS SIGNALING	0.792	6.17x10-2	NAN	ITGB1,PIK3R3,CD14,IRS2,PRKCA
EPHRIN A SIGNALING	0.784	6.67x10-2	NAN	PIK3R3,CFL1,ADAM10,IRS2
2-KETOGLUTARATE DEHYDROGENASE COMPLEX	0.781	2.00x10-1	NAN	OGDH
TETRAHYDROFOLATE SALVAGE FROM 5,10-METHENYLTETRAHYDROFOLATE	0.781	2.00x10-1	NAN	MTHFD2
LYSINE DEGRADATION II	0.781	2.00x10-1	NAN	AASDHPPT
LYSINE DEGRADATION V	0.781	2.00x10-1	NAN	AASDHPPT
2-OXOBUTANOATE DEGRADATION I	0.781	2.00x10-1	NAN	PCCA
OXIDATIVE ETHANOL DEGRADATION III	0.768	9.52x10-2	NAN	ALDH1L2,ACSS2
ENDOPLASMIC RETICULUM STRESS PATHWAY	0.768	9.52x10-2	NAN	MBTPS1,EIF2S1
ESTROGEN RECEPTOR SIGNALING	0.765	5.47x10-2	NAN	SHC1,TAF6,MAPK3,RBFOX2,MED13L,MED6,SMARCA4
3-PHOSPHOINOSITIDE BIOSYNTHESIS	0.762	5.03x10-2	NAN	PIK3R3,SOCS3,CD28,PIP5K1A,TNS3,DUSP1,IRS2,NUDT4,PPP4C,RASA1
ROLE OF PKR IN INTERFERON INDUCTION AND ANTIVIRAL RESPONSE	0.749	7.32x10-2	NAN	TRAF6,STAT1,EIF2S1
B CELL ACTIVATING FACTOR SIGNALING	0.749	7.32x10-2	NAN	TRAF6,NFAT5,ELK1
STEARATE BIOSYNTHESIS I (ANIMALS)	0.749	7.32x10-2	NAN	FASN,ACOT9,ELOVL6
AUTOPHAGY	0.748	6.45x10-2	NAN	ULK1,ATG3,NBR1,ATG16L1
POLYAMINE REGULATION IN COLON CANCER	0.737	9.09x10-2	NAN	PSMF1,OAZ2
SMALL CELL LUNG CANCER SIGNALING	0.732	5.88x10-2	NAN	TRAF6,PIK3R3,SUV39H1,IRS2,CCND1
NICOTINE DEGRADATION II	0.731	6.35x10-2	NAN	LArGE1,AOX1,CYP1B1,CYP51A1
PROLINE BIOSYNTHESIS II (FROM ARGININE)	0.709	1.67x10-1	NAN	PYCR1
ARGININE DEGRADATION VI (ARGINASE 2 PATHWAY)	0.709	1.67x10-1	NAN	PYCR1
GLYCEROL DEGRADATION I	0.709	1.67x10-1	NAN	Gk
UDP-N-ACETYL-D-GLUCOSAMINE BIOSYNTHESIS II	0.709	1.67x10-1	NAN	PGM3
GDP-MANNOSE BIOSYNTHESIS	0.709	1.67x10-1	NAN	PMM2
MIF REGULATION OF INNATE IMMUNITY	0.707	6.98x10-2	NAN	MAPK3,CD14,PLA2G2A
ROLE OF P14/P19ARF IN TUMOR SUPPRESSION	0.707	6.98x10-2	NAN	PIK3R3,IRS2,UBTF
ROLE OF LIPIDS/LIPID RAFTS IN THE PATHOGENESIS OF INFLUENZA	0.707	8.70x10-2	NAN	FDPS,IFNAR1
3-PHOSPHOINOSITIDE DEGRADATION	0.705	5.10x10-2	NAN	SOCS3,TNS3,DUSP1,PTPMT1,INPPL1,NUDT4,PPP4C,RASA1
ROLE OF RIG1-LIKE RECEPTORS IN ANTIVIRAL INNATE IMMUNITY	0.687	6.82x10-2	NAN	TRAF6,IRF7,TRIM25
ROLE OF IL-17F IN ALLERGIC INFLAMMATORY AIRWAY DISEASES	0.687	6.82x10-2	NAN	TRAF6,MAPK3,CREB5
MITOTIC ROLES OF POLO-LIKE KINASE	0.683	6.06x10-2	NAN	PPM1L,ANAPC13,CCNB1,SMC1A
ESTROGEN-MEDIATED S-PHASE ENTRY	0.679	8.33x10-2	NAN	CDKN1A,CCND1
SUPERPATHWAY OF D-MYO-INOSITOL (1,4,5)-TRISPHOSPHATE METABOLISM	0.679	8.33x10-2	NAN	INPPL1,INPP5A
BUPROPION DEGRADATION	0.652	8.00x10-2	NAN	CYP1B1,CYP51A1
ETHANOL DEGRADATION IV	0.652	8.00x10-2	NAN	ALDH1L2,ACSS2
CERAMIDE BIOSYNTHESIS	0.65	1.43x10-1	NAN	KDSR
ADENINE AND ADENOSINE SALVAGE III	0.65	1.43x10-1	NAN	HPRT1
CERAMIDE DEGRADATION	0.65	1.43x10-1	NAN	ASAH1
TRIACYLGLYCEROL BIOSYNTHESIS	0.649	6.52x10-2	NAN	AGPAT5,PLPPR2,ELOVL6
ACETONE DEGRADATION I (TO METHYLGLYOXAL)	0.603	7.41x10-2	NAN	CYP1B1,CYP51A1
HISTIDINE DEGRADATION III	0.599	1.25x10-1	NAN	MTHFD2
SUPEROXIDE RADICALS DEGRADATION	0.599	1.25x10-1	NAN	SOD3
IL-15 PRODUCTION	0.581	7.04x10-2	NAN	JAK2,STAT1
G-PROTEIN COUPLED RECEPTOR SIGNALING	0.573	4.40x10-2	NAN	PIK3R3,SHC1,DUSP1,MAPK3,CHRM4,PRKAR1B,IRS2,STAT3,CREB5,RASA1,MPPE1,PRKCA
NATURAL KILLER CELL SIGNALING	0.573	4.92x10-2	NAN	PIK3R3,SHC1,MAPK3,INPPL1,IRS2,PRKCA
HYPOXIA SIGNALING IN THE CARDIOVASCULAR SYSTEM	0.57	5.41x10-2	NAN	UBE2H,UBE2B,CREB5,UBE2T
AMYLOID PROCESSING	0.565	5.88x10-2	NAN	CSNK2A2,MAPK3,PRKAR1B
PHAGOSOME MATURATION	0.561	4.73x10-2	NAN	ATP6V0C,DYNC1LI1,RAB5C,TUBB6,TUBA8,DYNLT1,EEA1
SPHINGOSINE AND SPHINGOSINE-1-PHOSPHATE METABOLISM	0.556	1.11x10-1	NAN	ASAH1
PROSTANOID BIOSYNTHESIS	0.556	1.11x10-1	NAN	PTGIS
SUCROSE DEGRADATION V (MAMMALIAN)	0.556	1.11x10-1	NAN	Tpi1 (inCluDEs othErs)
PHOSPHATIDYLETHANOLAMINE BIOSYNTHESIS II	0.556	1.11x10-1	NAN	ETNK1
LEUCINE DEGRADATION I	0.556	1.11x10-1	NAN	AUH
GDP-GLUCOSE BIOSYNTHESIS	0.556	1.11x10-1	NAN	PGM3
FOLATE TRANSFORMATIONS I	0.556	1.11x10-1	NAN	MTHFD2
DOCOSAHEXAENOIC ACID (DHA) SIGNALING	0.55	5.77x10-2	NAN	PIK3R3,SERPINF1,IRS2
FCγRIIB SIGNALING IN B LYMPHOCYTES	0.535	5.66x10-2	NAN	PIK3R3,SHC1,IRS2
ATHEROSCLEROSIS SIGNALING	0.525	4.72x10-2	NAN	IL33,VCAM1,CXCL12,PLA2G2A,CLU,APOD
GLUCOSE AND GLUCOSE-1-PHOSPHATE DEGRADATION	0.517	1.00x10-1	NAN	PGM3
CALCIUM TRANSPORT I	0.517	1.00x10-1	NAN	ATP2A2
PENTOSE PHOSPHATE PATHWAY	0.517	1.00x10-1	NAN	PGD
ROLE OF CHK PROTEINS IN CELL CYCLE CHECKPOINT CONTROL	0.507	5.45x10-2	NAN	CDKN1A,PPM1L,NBN
G PROTEIN SIGNALING MEDIATED BY TUBBY	0.5	6.25x10-2	NAN	JAK2,GNG12
XENOBIOTIC METABOLISM SIGNALING	0.488	4.18x10-2	NAN	AHRR,PIK3R3,CHST2,ALDH1L2,MAPK3,GSTM3,PPM1L,IRS2,CYP1B1,SCAND1,SOD3,PRKCA
ASSEMBLY OF RNA POLYMERASE I COMPLEX	0.483	9.09x10-2	NAN	UBTF
DOLICHYL-DIPHOSPHOOLIGOSACCHARIDE BIOSYNTHESIS	0.483	9.09x10-2	NAN	DPM1
UDP-N-ACETYL-D-GALACTOSAMINE BIOSYNTHESIS II	0.483	9.09x10-2	NAN	PGM3
CIRCADIAN RHYTHM SIGNALING	0.483	6.06x10-2	NAN	CREB5,GRINA
WNT/CA+ PATHWAY	0.468	5.17x10-2	NAN	NFAT5,CREB5,PRKCA
INHIBITION OF ANGIOGENESIS BY TSP1	0.466	5.88x10-2	NAN	CD47,SDC1
RETINOATE BIOSYNTHESIS I	0.466	5.88x10-2	NAN	AKR1C3,DHRS7C
ACYL-COA HYDROLYSIS	0.453	8.33x10-2	NAN	ACOT9
GLYCOGEN DEGRADATION II	0.453	8.33x10-2	NAN	PGM3
IL-17A SIGNALING IN FIBROBLASTS	0.45	5.71x10-2	NAN	TRAF6,MAPK3
AMYOTROPHIC LATERAL SCLEROSIS SIGNALING	0.443	4.50x10-2	NAN	PIK3R3,RAB5C,NEFH,IRS2,GRINA
α-ADRENERGIC SIGNALING	0.427	4.60x10-2	NAN	MAPK3,PRKAR1B,GNG12,PRKCA
ASSEMBLY OF RNA POLYMERASE III COMPLEX	0.425	7.69x10-2	NAN	GTF3C1
NAD PHOSPHORYLATION AND DEPHOSPHORYLATION	0.425	7.69x10-2	NAN	ACp1/LOC102549052
RETINOIC ACID MEDIATED APOPTOSIS SIGNALING	0.42	4.84x10-2	NAN	TIPARP,TNKS2,IFNAR1
ETHANOL DEGRADATION II	0.419	5.41x10-2	NAN	ALDH1L2,ACSS2
MELATONIN DEGRADATION I	0.41	4.76x10-2	NAN	LArGE1,CYP1B1,CYP51A1
DNA DOUBLE-STRAND BREAK REPAIR BY HOMOLOGOUS RECOMBINATION	0.4	7.14x10-2	NAN	NBN
DNA DOUBLE-STRAND BREAK REPAIR BY NON-HOMOLOGOUS END JOINING	0.4	7.14x10-2	NAN	NBN
ANDROGEN BIOSYNTHESIS	0.4	7.14x10-2	NAN	AKR1C3
GLYCOGEN DEGRADATION III	0.4	7.14x10-2	NAN	PGM3
COLANIC ACID BUILDING BLOCKS BIOSYNTHESIS	0.4	7.14x10-2	NAN	PMM2
HUMAN EMBRYONIC STEM CELL PLURIPOTENCY	0.398	4.20x10-2	NAN	PIK3R3,TGFB2,SMAD6,IRS2,TCF7L1,INHBA
D-MYO-INOSITOL (1,4,5,6)-TETRAKISPHOSPHATE BIOSYNTHESIS	0.398	4.20x10-2	NAN	SOCS3,TNS3,DUSP1,NUDT4,PPP4C,RASA1
D-MYO-INOSITOL (3,4,5,6)-TETRAKISPHOSPHATE BIOSYNTHESIS	0.398	4.20x10-2	NAN	SOCS3,TNS3,DUSP1,NUDT4,PPP4C,RASA1
PXR/RXR ACTIVATION	0.389	4.62x10-2	NAN	SCD,CYP7A1,PRKAR1B
ERK5 SIGNALING	0.389	4.62x10-2	NAN	IL6ST,SGK1,CREB5
HIF1α SIGNALING	0.387	4.24x10-2	NAN	PIK3R3,MMP14,MAPK3,MMP11,IRS2
CALCIUM-INDUCED T LYMPHOCYTE APOPTOSIS	0.378	4.55x10-2	NAN	HDAC1l,ATP2A2,PRKCA
TRANSCRIPTIONAL REGULATORY NETWORK IN EMBRYONIC STEM CELLS	0.378	5.00x10-2	NAN	TCF7L1,STAT3
NNOS SIGNALING IN SKELETAL MUSCLE CELLS	0.378	6.67x10-2	NAN	DAG1
EICOSANOID SIGNALING	0.369	4.48x10-2	NAN	PTGIS,AKR1C3,PLA2G2A
MECHANISMS OF VIRAL EXIT FROM HOST CELLS	0.365	4.48x10-2	NAN	CHMP2B,PRKCA
SUPERPATHWAY OF MELATONIN DEGRADATION	0.359	4.41x10-2	NAN	LArGE1,CYP1B1,CYP51A1
METHYLGLYOXAL DEGRADATION III	0.357	6.25x10-2	NAN	AKR1C3
ROLE OF IL-17A IN ARTHRITIS	0.35	4.35x10-2	NAN	PIK3R3,MAPK3,IRS2
UVC-INDUCED MAPK SIGNALING	0.342	4.65x10-2	NAN	MAPK3,PRKCA
MYC MEDIATED APOPTOSIS SIGNALING	0.341	4.29x10-2	NAN	PIK3R3,SHC1,IRS2
γ-LINOLENATE BIOSYNTHESIS II (ANIMALS)	0.337	5.88x10-2	NAN	FADS1
ROLE OF MAPK SIGNALING IN THE PATHOGENESIS OF INFLUENZA	0.324	4.17x10-2	NAN	MAPK3,PLA2G2A,PRKCA
MSP-RON SIGNALING PATHWAY	0.324	4.17x10-2	NAN	PIK3R3,IRS2,JAK2
HISTAMINE DEGRADATION	0.303	5.26x10-2	NAN	ALDH1L2
DNA DAMAGE-INDUCED 14-3-3σ SIGNALING	0.303	5.26x10-2	NAN	CCNB1
NNOS SIGNALING IN NEURONS	0.299	4.26x10-2	NAN	GRINA,PRKCA
BMP SIGNALING PATHWAY	0.292	3.95x10-2	NAN	MAPK3,PRKAR1B,SMAD6
D-MYO-INOSITOL-5-PHOSPHATE METABOLISM	0.291	3.73x10-2	NAN	SOCS3,TNS3,DUSP1,NUDT4,PPP4C,RASA1
GRAFT-VERSUS-HOST DISEASE SIGNALING	0.29	4.17x10-2	NAN	IL33,CD28
CARDIOMYOCYTE DIFFERENTIATION VIA BMP RECEPTORS	0.288	5.00x10-2	NAN	SMAD6
GRANZYME A SIGNALING	0.288	5.00x10-2	NAN	Hist1h1E
THE VISUAL CYCLE	0.288	5.00x10-2	NAN	AKR1C3
ROLE OF WNT/GSK-3β SIGNALING IN THE PATHOGENESIS OF INFLUENZA	0.284	3.90x10-2	NAN	CSNK1G3,TCF7L1,IFNAR1
DOPAMINE RECEPTOR SIGNALING	0.284	3.90x10-2	NAN	PPM1L,PRKAR1B,SLC18A3
ANGIOPOIETIN SIGNALING	0.277	3.85x10-2	NAN	PIK3R3,IRS2,RASA1
FATTY ACID α-OXIDATION	0.26	4.55x10-2	NAN	ALDH1L2
PYRIMIDINE DEOXYRIBONUCLEOTIDES DE NOVO BIOSYNTHESIS I	0.248	4.35x10-2	NAN	DUT
TCA CYCLE II (EUKARYOTIC)	0.248	4.35x10-2	NAN	OGDH
PUTRESCINE DEGRADATION III	0.248	4.35x10-2	NAN	ALDH1L2
RENAL CELL CARCINOMA SIGNALING	0.244	3.61x10-2	NAN	PIK3R3,MAPK3,IRS2
CDP-DIACYLGLYCEROL BIOSYNTHESIS I	0.236	4.17x10-2	NAN	AGPAT5
IL-17A SIGNALING IN GASTRIC CELLS	0.225	4.00x10-2	NAN	MAPK3
TRYPTOPHAN DEGRADATION X (MAMMALIAN, VIA TRYPTAMINE)	0.225	4.00x10-2	NAN	ALDH1L2
LIPID ANTIGEN PRESENTATION BY CD1	0.214	3.85x10-2	NAN	AP1B1
ANTIPROLIFERATIVE ROLE OF TOB IN T CELL SIGNALING	0.214	3.85x10-2	NAN	TGFB2
NAD SALVAGE PATHWAY II	0.214	3.85x10-2	NAN	ACp1/LOC102549052
GLYCOLYSIS I	0.214	3.85x10-2	NAN	Tpi1 (inCluDEs othErs)
D-MYO-INOSITOL (1,4,5)-TRISPHOSPHATE BIOSYNTHESIS	0.205	3.70x10-2	NAN	PIP5K1A
INTERFERON SIGNALING	2.07	1.39x10-1	2.236	IFITM3,JAK2,STAT1,IFNAR1,ISG15
ANDROGEN SIGNALING	1.35	7.21x10-2	2.236	SHC1,HSPA4,TGFB1I1,MAPK3,PRKAR1B,CCND1,GNG12,PRKCA
NRF2-MEDIATED OXIDATIVE STRESS RESPONSE	0.82	5.18x10-2	2.236	PIK3R3,DNAJB12,MAPK3,ABCC1,GSTM3,IRS2,AOX1,SOD3,FTH1,PRKCA
G BETA GAMMA SIGNALING	0.69	5.68x10-2	2.236	SHC1,MAPK3,PRKAR1B,GNG12,PRKCA
ONCOSTATIN M SIGNALING	4.71	2.35x10-1	2.121	IL6ST,SHC1,TIMP3,MAPK3,JAK2,STAT3,ELK1,STAT1
THROMBOPOIETIN SIGNALING	2.68	1.23x10-1	2.121	PIK3R3,SHC1,MAPK3,IRS2,JAK2,STAT3,STAT1,PRKCA
IL-3 SIGNALING	3.15	1.20x10-1	1.897	PIK3R3,SHC1,STAT6,MAPK3,IRS2,JAK2,STAT3,ELK1,STAT1,PRKCA
CNTF SIGNALING	2.16	1.11x10-1	1.89	IL6ST,PIK3R3,MAPK3,IRS2,JAK2,STAT3,STAT1
ALDOSTERONE SIGNALING IN EPITHELIAL CELLS	1.76	7.14x10-2	1.89	PIK3R3,HSPA4,PIP5K1A,DNAJB12,SGK1,DUSP1,MAPK3,SLC12A2,HSPA1A/HSPA1B,HSPB11,IRS2,PRKCA
ROLE OF NANOG IN MAMMALIAN EMBRYONIC STEM CELL PLURIPOTENCY	1.16	6.56x10-2	1.89	IL6ST,PIK3R3,SHC1,MAPK3,IRS2,TCF7L1,JAK2,STAT3
ENDOTHELIN-1 SIGNALING	0.438	4.21x10-2	1.89	PIK3R3,SHC1,MAPK3,SHC2,ECE1,IRS2,PLA2G2A,PRKCA
RENIN-ANGIOTENSIN SIGNALING	2.38	9.02x10-2	1.667	PIK3R3,SHC1,MAPK3,SHC2,PRKAR1B,IRS2,JAK2,STAT3,ELK1,STAT1,PRKCA
TH1 PATHWAY	1.28	6.67x10-2	1.667	PIK3R3,SOCS3,CD28,NOTCH2,IRS2,JAK2,STAT3,STAT1,IFNAR1
VEGF FAMILY LIGAND-RECEPTOR INTERACTIONS	1.43	7.95x10-2	1.633	PIK3R3,SHC1,NRP2,MAPK3,IRS2,PLA2G2A,PRKCA
JAK/STAT SIGNALING	3.77	1.33X10-1	1.508	PIK3R3,SHC1,STAT6,SOCS3,MAPK3,CDKN1A,IRS2,JAK2,STAT3,STAT1,SOCS7
FLT3 SIGNALING IN HEMATOPOIETIC PROGENITOR CELLS	3.68	1.29x10-1	1.508	PIK3R3,SHC1,STAT6,CBL,MAPK3,IRS2,STAT3,ELK1,STAT1,CREB5,EIF4EBP1
HUNTINGTON'S DISEASE SIGNALING	1.56	6.17x10-2	1.414	PSMF1,SGK1,HSPA1A/HSPA1B,RCOR1,HDAC1l,CREB5,PIK3R3,SHC1,HSPA4,MAPK3,TCERG1,IRS2,RASA1,GNG12,PRKCA
TH2 PATHWAY	1.06	6.00x10-2	1.414	IL33,PIK3R3,STAT6,SOCS3,CD28,NOTCH2,IRS2,JAK2,JAG1
EPHRIN RECEPTOR SIGNALING	4.29	1.03x10-1	1.387	ITGB1,EPHB4,PXN,CFL1,WAsl,CXCL12,JAK2,STAT3,CREB5,GRINA,SHC1,ITGA3,SDCBP,ACTR3,MAPK3,ADAM10,RASA1,GNG12
ERK/MAPK SIGNALING	4.52	1.01x10-1	1.342	ITGB1,PXN,STAT3,CREB5,PLA2G2A,EIF4EBP1,PIK3R3,SHC1,ITGA3,ELF2,TLN2,ETS2,DUSP1,MAPK3,PPM1L,PRKAR1B,IRS2,STAT1,ELK1,PRKCA
ERBB4 SIGNALING	0.946	6.94x10-2	1.342	PIK3R3,SHC1,MAPK3,IRS2,PRKCA
SYNAPTIC LONG TERM POTENTIATION	0.365	4.13x10-2	1.342	MAPK3,PRKAR1B,CREB5,GRINA,PRKCA
ICOS-ICOSL SIGNALING IN T HELPER CELLS	0.351	4.07x10-2	1.342	PIK3R3,SHC1,CD28,NFAT5,IRS2
ROLE OF NFAT IN REGULATION OF THE IMMUNE RESPONSE	0.306	3.76x10-2	1.342	PIK3R3,CD28,NFAT5,MAPK3,CSNK1G3,IRS2,GNG12
PKCθ SIGNALING IN T LYMPHOCYTES	0.289	3.76x10-2	1.342	PIK3R3,CD28,NFAT5,MAPK3,IRS2
PROLACTIN SIGNALING	3.15	1.20x10-1	1.265	PIK3R3,SHC1,SOCS3,MAPK3,IRS2,JAK2,STAT3,STAT1,SOCS7,PRKCA
PDGF SIGNALING	4.09	1.33x10-1	1.155	PIK3R3,SHC1,CSNK2A2,MAPK3,INPPL1,IRS2,JAK2,STAT3,ELK1,STAT1,RASA1,PRKCA
TEC KINASE SIGNALING	2.1	7.65x10-2	1.155	ITGB1,PIK3R3,STAT6,YES1,ITGA3,RND3,GTF2I,IRS2,STAT3,JAK2,STAT1,GNG12,PRKCA
PAXILLIN SIGNALING	1.71	7.96x10-2	1.134	ITGB1,PIK3R3,PXN,ITGA3,TLN2,ITGA11,ITGA6,IRS2,ACTN1
GLIOMA SIGNALING	1.33	7.14x10-2	1.134	PIK3R3,SHC1,MAPK3,SUV39H1,CDKN1A,IRS2,CCND1,PRKCA
CHOLECYSTOKININ/GASTRIN-MEDIATED SIGNALING	1.16	6.93x10-2	1.134	IL33,SHC1,PXN,RND3,MAPK3,ELK1,PRKCA
UVA-INDUCED MAPK SIGNALING	1.08	6.66x10-2	1.134	PIK3R3,TIPARP,MAPK3,TNKS2,IRS2,STAT1,PRKCA
ROLE OF PATTERN RECOGNITION RECEPTORS IN RECOGNITION OF BACTERIA AND VIRUSES	0.936	5.84x10-2	1.134	TRAF6,PIK3R3,IRF7,MAPK3,TGFB2,IRS2,EIF2S1,PRKCA
NEUROPATHIC PAIN SIGNALING IN DORSAL HORN NEURONS	0.936	6.09x10-2	1.134	PIK3R3,MAPK3,PRKAR1B,IRS2,ELK1,GRINA,PRKCA
COLORECTAL CANCER METASTASIS SIGNALING	1.49	6.05x10-2	1.069	IL6ST,MMP14,JAK2,TCF7L1,STAT3,CCND1,PIK3R3,RND3,MAPK3,TGFB2,PRKAR1B,IRS2,MMP11,STAT1,GNG12
GM-CSF SIGNALING	2.96	1.23x10-1	1	PIK3R3,SHC1,MAPK3,IRS2,JAK2,STAT3,ELK1,STAT1,CCND1
REGULATION OF CELLULAR MECHANICS BY CALPAIN PROTEASE	2.4	1.23x10-1	1	ITGB1,PXN,ITGA3,TLN2,MAPK3,CCND1,ACTN1
IL-22 SIGNALING	2.02	1.67x10-1	1	SOCS3,MAPK3,STAT3,STAT1
MOUSE EMBRYONIC STEM CELL PLURIPOTENCY	1.88	8.49x10-2	1	IL6ST,PIK3R3,ID2,MAPK3,IRS2,TCF7L1,JAK2,STAT3,ID3
EPHRIN B SIGNALING	1.82	9.59x10-2	1	PXN,EPHB4,CBL,CFL1,MAPK3,CXCL12,GNG12
INOS SIGNALING	1.12	8.89x10-2	1	TRAF6,CD14,JAK2,STAT1
CELL CYCLE: G2/M DNA DAMAGE CHECKPOINT REGULATION	1.02	8.16x10-2	1	CDKN1A,PTPMT1,HIPK2,CCNB1
GDNF FAMILY LIGAND-RECEPTOR INTERACTIONS	0.874	6.58x10-2	1	PIK3R3,SHC1,MAPK3,IRS2,RASA1
ROLE OF PI3K/AKT SIGNALING IN THE PATHOGENESIS OF INFLUENZA	0.824	6.33x10-2	1	PIK3R3,MAPK3,ZNF346,IRS2,IFNAR1
MELATONIN SIGNALING	0.596	5.56x10-2	1	RORA,MAPK3,PRKAR1B,PRKCA
TREM1 SIGNALING	0.557	5.33x10-2	1	ITGB1,MAPK3,JAK2,STAT3
HGF SIGNALING	3.64	1.13x10-1	0.905	ITGB1,PIK3R3,ELF2,PXN,ITGA3,ETS2,MAPK3,CDKN1A,IRS2,STAT3,ELK1,CCND1,PRKCA
RHOGDI SIGNALING	1.68	6.94x10-2	0.905	ITGB1,ARHGAP5,PIP5K1A,ITGA3,ACTR3,RND3,CFL1,MYLPF,CD44,CDH15,GNG12,PRKCA
PRODUCTION OF NITRIC OXIDE AND REACTIVE OXYGEN SPECIES IN MACROPHAGES	1.06	5.67x10-2	0.905	PIK3R3,RND3,MAPK3,PPM1L,IRS2,JAK2,STAT1,CLU,APOD,PRKCA,TNFRSF11B
IL-6 SIGNALING	3.72	1.09x10-1	0.832	IL6ST,SOCS3,JAK2,STAT3,TRAF6,PIK3R3,IL33,CSNK2A2,SHC1,MAPK3,CD14,IRS2,ELK1,TNFRSF11B
AGRIN INTERACTIONS AT NEUROMUSCULAR JUNCTION	1.95	1.01x10-1	0.816	ITGB1,PXN,ITGA3,MAPK3,ITGA6,DAG1,AGRN
LEPTIN SIGNALING IN OBESITY	1.48	8.14x10-2	0.816	PIK3R3,SOCS3,MAPK3,PRKAR1B,IRS2,JAK2,STAT3
STAT3 PATHWAY	1.32	8.11x10-2	0.816	SOCS3,MAPK3,CDKN1A,JAK2,STAT3,SOCS7
IL-17A SIGNALING IN AIRWAY CELLS	1.23	7.69x10-2	0.816	TRAF6,PIK3R3,MAPK3,IRS2,JAK2,STAT3
LPS-STIMULATED MAPK SIGNALING	1.05	6.90x10-2	0.816	PIK3R3,MAPK3,CD14,IRS2,ELK1,PRKCA
FGF SIGNALING	0.994	6.67x10-2	0.816	PIK3R3,MAPK3,IRS2,STAT3,CREB5,PRKCA
MELANOCYTE DEVELOPMENT AND PIGMENTATION SIGNALING	0.88	6.19x10-2	0.816	PIK3R3,SHC1,MAPK3,PRKAR1B,IRS2,CREB5
P2Y PURIGENIC RECEPTOR SIGNALING PATHWAY	0.708	5.26x10-2	0.816	PIK3R3,MAPK3,PRKAR1B,IRS2,CREB5,GNG12,PRKCA
FC EPSILON RI SIGNALING	0.603	5.04x10-2	0.816	PIK3R3,MAPK3,INPPL1,IRS2,PLA2G2A,PRKCA
P70S6K SIGNALING	0.482	4.55x10-2	0.816	PIK3R3,SHC1,MAPK3,PPM1L,IRS2,PRKCA
DOPAMINE-DARPP32 FEEDBACK IN CAMP SIGNALING	0.443	4.29x10-2	0.816	CSNK1G3,PPM1L,PRKAR1B,CREB5,ATP2A2,GRINA,PRKCA
ACTIN CYTOSKELETON SIGNALING	3.29	8.37x10-2	0.728	ITGB1,PXN,CFL1,MYLPF,GSN,TTN,PIK3R3,SHC1,PIP5K1A,ITGA3,TLN2,ACTR3,Ppp1r12A,FLNA,MAPK3,CD14,IRS2,GNG12,ACTN1
PAK SIGNALING	2	8.91x10-2	0.707	ITGB1,PIK3R3,SHC1,PXN,ITGA3,CFL1,MAPK3,MYLPF,IRS2
VEGF SIGNALING	1.95	8.74x10-2	0.707	PIK3R3,SHC1,PXN,MAPK3,Flt1,IRS2,EIF2S1,ACTN1,PRKCA
CREB SIGNALING IN NEURONS	0.669	4.86x10-2	0.707	PIK3R3,SHC1,MAPK3,PRKAR1B,IRS2,ELK1,CREB5,GNG12,PRKCA
AMPK SIGNALING	3.91	9.36x10-2	0.632	PBRM1,FOXO4,ULK1,CHRM4,CHRNB1,CREB5,CCND1,SMARCA4,EIF4EBP1,PIK3R3,SMARCA2,FASN,CDKN1A,PPM1L,PRKAR1B,IRS2,SMARCC2,MLYCD,HMGCR
EGF SIGNALING	3.86	1.47x10-1	0.632	PIK3R3,SHC1,CSNK2A2,MAPK3,IRS2,STAT3,ELK1,STAT1,RASA1,PRKCA
GROWTH HORMONE SIGNALING	3.15	1.20x10-1	0.632	PIK3R3,SOCS3,MAPK3,IRS2,JAK2,STAT3,ELK1,STAT1,SOCS7,PRKCA
PI3K/AKT SIGNALING	2.3	8.80x10-2	0.632	ITGB1,PIK3R3,SHC1,ITGA3,MAPK3,CDKN1A,PPM1L,INPPL1,JAK2,CCND1,EIF4EBP1
DENDRITIC CELL MATURATION	1.37	6.25x10-2	0.577	TRAF6,IL33,PIK3R3,DDR2,MAPK3,FSCN1,IRS2,JAK2,STAT1,CREB5,IFNAR1,TNFRSF11B
PHOSPHOLIPASE C SIGNALING	1.31	5.83x10-2	0.577	ITGB1,RALA,MYLPF,HDAC1l,CREB5,PLA2G2A,SHC1,ITGA3,NFAT5,RND3,Ppp1r12A,MAPK3,GNG12,PRKCA
ACUTE PHASE RESPONSE SIGNALING	3.91	1.00x10-1	0.535	IL6ST,SOCS3,C1S,SERPINF1,SERPINA3,JAK2,STAT3,TRAF6,IL33,PIK3R3,C1R,SHC1,MAPK3,ELK1,SOCS7,SERPINE1,TNFRSF11B
IL-9 SIGNALING	1.67	1.11x10-1	0.447	PIK3R3,SOCS3,IRS2,STAT3,STAT1
CELL CYCLE: G1/S CHECKPOINT REGULATION	1.59	9.38x10-2	0.447	CCND2,SUV39H1,CDKN1A,TGFB2,HDAC1l,CCND1
IL-2 SIGNALING	1.59	9.38x10-2	0.447	PIK3R3,SHC1,CSNK2A2,MAPK3,IRS2,ELK1
14-3-3-MEDIATED SIGNALING	1.35	6.87x10-2	0.447	PIK3R3,SRPK2,CBL,TUBB6,TUBA8,MAPK3,IRS2,ELK1,PRKCA
ANTIPROLIFERATIVE ROLE OF SOMATOSTATIN RECEPTOR 2	1.3	8.00x10-2	0.447	PIK3R3,MAPK3,CDKN1A,IRS2,ELK1,GNG12
NON-SMALL CELL LUNG CANCER SIGNALING	1.25	7.79x10-2	0.447	PIK3R3,MAPK3,SUV39H1,IRS2,CCND1,PRKCA
LYMPHOTOXIN β RECEPTOR SIGNALING	1.05	7.46x10-2	0.447	TRAF6,PIK3R3,VCAM1,MAPK3,IRS2
P53 SIGNALING	0.996	6.31x10-2	0.447	PIK3R3,CCND2,CDKN1A,IRS2,HIPK2,CCND1,SERPINE2
CHEMOKINE SIGNALING	0.966	7.04x10-2	0.447	CFL1,Ppp1r12A,MAPK3,CXCL12,PRKCA
CARDIAC β-ADRENERGIC SIGNALING	0.936	5.84x10-2	0.447	AKAP2,AKAP12,PPM1L,PRKAR1B,PKIA,ATP2A2,GNG12,MPPE1
NEUROTROPHIN/TRK SIGNALING	0.874	6.58x10-2	0.447	PIK3R3,SHC1,MAPK3,IRS2,CREB5
CD40 SIGNALING	0.824	6.33x10-2	0.447	TRAF6,PIK3R3,MAPK3,IRS2,STAT3
CERAMIDE SIGNALING	0.627	5.38x10-2	0.447	PIK3R3,MAPK3,PPM1L,IRS2,TNFRSF11B
RELAXIN SIGNALING	0.511	4.55x10-2	0.447	PIK3R3,MAPK3,PRKAR1B,IRS2,ELK1,GNG12,MPPE1
CORTICOTROPIN RELEASING HORMONE SIGNALING	0.443	45.0x10-2	0.447	MAPK3,PRKAR1B,ELK1,CREB5,PRKCA
GNRH SIGNALING	0.313	3.88x10-2	0.447	MAPK3,PRKAR1B,ELK1,CREB5,PRKCA
CD28 SIGNALING IN T HELPER CELLS	0.295	3.79x10-2	0.447	PIK3R3,CD28,ACTR3,NFAT5,IRS2
REGULATION OF EIF4 AND P70S6K SIGNALING	3.81	1.02x10-1	0.378	ITGB1,EIF3C,EIF4EBP2,EIF3J,EIF3E,PAIP2,EIF4G1,EIF2S1,EIF4EBP1,PIK3R3,SHC1,ITGA3,MAPK3,PPM1L,IRS2,AGO1
ERBB2-ERBB3 SIGNALING	1.95	1.01x10-1	0.378	PIK3R3,SHC1,MAPK3,IRS2,STAT3,ELK1,CCND1
TELOMERASE SIGNALING	1.76	8.11x10-2	0.378	PIK3R3,SHC1,ELF2,ETS2,MAPK3,CDKN1A,PPM1L,HDAC1l,IRS2
NF-κB ACTIVATION BY VIRUSES	1.45	8.05x10-2	0.378	ITGB1,PIK3R3,ITGA3,MAPK3,ITGA6,IRS2,PRKCA
RANK SIGNALING IN OSTEOCLASTS	1.15	6.86x10-2	0.378	TRAF6,PIK3R3,CBL,MAPK3,IRS2,ELK1,GSN
FMLP SIGNALING IN NEUTROPHILS	1.14	6.50x10-2	0.378	PIK3R3,ACTR3,NFAT5,MAPK3,IRS2,ELK1,GNG12,PRKCA
CALCIUM SIGNALING	0.972	5.59x10-2	0.378	NFAT5,TNNC2,MAPK3,CHRNB1,PRKAR1B,HDAC1l,CREB5,ATP2A2,GRINA,Tpm3
NITRIC OXIDE SIGNALING IN THE CARDIOVASCULAR SYSTEM	0.965	6.19x10-2	0.378	PIK3R3,MAPK3,Flt1,PRKAR1B,IRS2,ATP2A2,PRKCA
FCγ RECEPTOR-MEDIATED PHAGOCYTOSIS IN MACROPHAGES AND MONOCYTES	2.23	9.68x10-2	0.333	PIK3R3,YES1,PIP5K1A,PXN,ACTR3,CBL,TLN2,MAPK3,PRKCA
CXCR4 SIGNALING	1.15	6.06x10-2	0.333	PIK3R3,PXN,RND3,MAPK3,MYLPF,CXCL12,IRS2,ELK1,GNG12,PRKCA
B CELL RECEPTOR SIGNALING	0.626	4.74x10-2	0.333	PIK3R3,SHC1,NFAT5,CFL1,MAPK3,INPPL1,IRS2,ELK1,CREB5
INSULIN RECEPTOR SIGNALING	2.34	8.51x10-2	0.302	PIK3R3,SHC1,FOXO4,SOCS3,CBL,SGK1,MAPK3,PRKAR1B,INPPL1,IRS2,JAK2,EIF4EBP1
IGF-1 SIGNALING	5.29	1.42x10-1	0.277	SOCS3,PXN,IGFBP5,JAK2,STAT3,PIK3R3,SHC1,CSNK2A2,MAPK3,PRKAR1B,IRS2,CYR61,ELK1,SOCS7,RASA1
PROTEIN KINASE A SIGNALING	1.34	5.30x10-2	0.277	AKAP12,PXN,MYLPF,ACp1/LOC102549052,TCF7L1,CREB5,TTN,ANAPC13,MPPE1,AKAP2,Hist1h1E,PTPN4,NFAT5,FLNA,DUSP1,MAPK3,PRKAR1B,TGFB2,ELK1,GNG12,PRKCA
LEUKOCYTE EXTRAVASATION SIGNALING	3.24	8.53x10-2	0.243	ITGB1,TIMP3,VCAM1,PXN,CLDN15,MMP14,WAsl,CTNNA1,CXCL12,ITGA6,PIK3R3,ARHGAP5,ITGA3,CD44,IRS2,MMP11,ACTN1,PRKCA
INTEGRIN SIGNALING	4.41	9.59x10-2	0	ITGB1,PXN,RALA,WAsl,ITGA6,GSN,TTN,PIK3R3,ARHGAP5,SHC1,ITGA3,TLN2,ACTR3,RND3,ARF3,Ppp1r12A,ITGA11,MAPK3,ZYX,IRS2,ACTN1
PANCREATIC ADENOCARCINOMA SIGNALING	3.53	1.10x10-1	0	RALA,SUV39H1,JAK2,STAT3,RALBP1,CCND1,PIK3R3,MAPK3,CDKN1A,TGFB2,IRS2,ELK1,STAT1
PTEN SIGNALING	2.96	1.01x10-1	0	ITGB1,PIK3R3,SHC1,FOXO4,CSNK2A2,ITGA3,CBL,MAPK3,CDKN1A,INPPL1,CCND1,BCL2L11
RAC SIGNALING	2.52	9.40x10-2	0	ITGB1,PIK3R3,PIP5K1A,ITGA3,ACTR3,CFL1,MAPK3,CD44,IRS2,ELK1,ANK1
ATM SIGNALING	2.12	1.00x10-1	0	USP7,SUV39H1,CDKN1A,ZEB1,CREB5,NBN,CCNB1,SMC1A
VDR/RXR ACTIVATION	1.68	8.97x10-2	0	SERPINB1,SPP1,CDKN1A,TGFB2,CD14,IGFBP5,PRKCA
ACTIVATION OF IRF BY CYTOSOLIC PATTERN RECOGNITION RECEPTORS	1.62	9.52x10-2	0	TRAF6,IRF7,ADAR,STAT1,IFNAR1,ISG15
EIF2 SIGNALING	1.57	6.33x10-2	0	EIF3C,RPL36AL,ATF5,EIF3J,EIF3E,EIF4G1,EIF2S1,CCND1,PIK3R3,SHC1,MAPK3,Rpl39l,IRS2,AGO1
ACUTE MYELOID LEUKEMIA SIGNALING	1.32	7.53x10-2	0	PIK3R3,MAPK3,IRS2,TCF7L1,STAT3,CCND1,EIF4EBP1
Gα12/13 SIGNALING	1.02	6.11x10-2	0	PIK3R3,PXN,MAPK3,MYLPF,IRS2,CDH15,ELK1,RASA1
GαI SIGNALING	0.866	5.83x10-2	0	SHC1,RALA,MAPK3,CHRM4,PRKAR1B,STAT3,GNG12
THROMBIN SIGNALING	0.717	4.90x10-2	0	PIK3R3,SHC1,RND3,Ppp1r12A,MAPK3,MYLPF,IRS2,ELK1,GNG12,PRKCA
GLIOBLASTOMA MULTIFORME SIGNALING	0.676	5.00x10-2	0	PIK3R3,SHC1,RND3,MAPK3,CDKN1A,NF2,IRS2,CCND1
TOLL-LIKE RECEPTOR SIGNALING	0.545	5.26x10-2	0	TRAF6,IL33,CD14,ELK1
PPARα/RXRα ACTIVATION	0.507	4.44x10-2	0	TRAF6,SHC1,MAPK3,FASN,PRKAR1B,TGFB2,JAK2,PRKCA
SAPK/JNK SIGNALING	0.507	4.81x10-2	0	PIK3R3,SHC1,MAPK8IP2,IRS2,ELK1
GαS SIGNALING	0.46	4.59x10-2	0	MAPK3,PRKAR1B,ELK1,CREB5,GNG12
GαQ SIGNALING	0.457	4.35x10-2	0	PIK3R3,RND3,MAPK3,IRS2,ELK1,GNG12,PRKCA
SPHINGOSINE-1-PHOSPHATE SIGNALING	0.338	4.00x10-2	0	PIK3R3,RND3,MAPK3,IRS2,ASAH1
ILK SIGNALING	1.63	6.63x10-2	-0.277	ITGB1,PIK3R3,TGFB1I1,PXN,RND3,CFL1,FLNA,MAPK3,PPM1L,IRS2,CREB5,CCND1,ACTN1
ARYL HYDROCARBON RECEPTOR SIGNALING	2.36	8.57x10-2	-0.333	AHRR,CCND2,NFIC,ALDH1L2,MAPK3,GSTM3,CDKN1A,TGFB2,NFIB,CCND1,CYP1B1,SMARCA4
ENOS SIGNALING	0.837	5.36x10-2	-0.333	PIK3R3,HSPA4,CHRM4,CHRNB1,Flt1,HSPA1A/HSPA1B,PRKAR1B,IRS2,PRKCA
LXR/RXR ACTIVATION	3.42	1.07x10-1	-0.378	SCD,SERPINF1,IL33,FDFT1,LDLR,FASN,CYP7A1,CD14,HMGCR,CLU,CYP51A1,APOD,TNFRSF11B
NEUREGULIN SIGNALING	2.39	1.02x10-1	-0.378	ITGB1,PIK3R3,SHC1,ITGA3,MAPK3,ERRFI1,ELK1,RNF41,PRKCA
PEDF SIGNALING	1.45	8.05x10-2	-0.378	PIK3R3,MAPK3,SERPINF1,IRS2,TCF7L1,ZEB1,ELK1
NGF SIGNALING	0.866	5.83x10-2	-0.378	TRAF6,PIK3R3,SHC1,MAPK3,IRS2,ELK1,CREB5
TYPE II DIABETES MELLITUS SIGNALING	0.765	5.47x10-2	-0.447	PIK3R3,SOCS3,MAPK3,IRS2,SOCS7,PRKCA,TNFRSF11B
PI3K SIGNALING IN B LYMPHOCYTES	0.742	5.38x10-2	-0.447	CD81,CBL,NFAT5,ATF5,MAPK3,IRS2,ELK1
RHOA SIGNALING	2.8	9.68x10-2	-0.632	ARHGAP5,SEPT8,PIP5K1A,ACTR3,RND3,NRP2,CFL1,Ppp1r12A,MYLPF,SEPT7,CDC42EP1,TTN
P38 MAPK SIGNALING	1.21	6.72x10-2	-0.707	TRAF6,IL33,DUSP1,TGFB2,ELK1,STAT1,CREB5,PLA2G2A
CAMP-MEDIATED SIGNALING	0.566	4.48x10-2	-0.707	AKAP2,AKAP12,DUSP1,MAPK3,CHRM4,PRKAR1B,PKIA,STAT3,CREB5,MPPE1
CARDIAC HYPERTROPHY SIGNALING	0.334	3.81x10-2	-0.707	PIK3R3,RND3,MAPK3,MYLPF,PRKAR1B,TGFB2,IRS2,ELK1,GNG12
ESTROGEN-DEPENDENT BREAST CANCER SIGNALING	2.22	1.04x10-1	-0.816	PIK3R3,MAPK3,HSD17B7,HSD17B12,IRS2,ELK1,CREB5,CCND1
CYCLINS AND CELL CYCLE REGULATION	2.19	1.03x10-1	-0.816	CCND2,SUV39H1,CDKN1A,PPM1L,TGFB2,HDAC1l,CCND1,CCNB1
TYPE I DIABETES MELLITUS SIGNALING	0.996	6.31x10-2	-0.816	TRAF6,SOCS3,CD28,JAK2,STAT1,SOCS7,TNFRSF11B
PPAR SIGNALING	0.911	6.32x10-2	-0.816	TRAF6,IL33,SHC1,MAPK3,SCAND1,TNFRSF11B
IL-8 SIGNALING	1.3	6.09x10-2	-0.905	TRAF6,PIK3R3,VCAM1,CCND2,RND3,MAPK3,Flt1,IRS2,CCND1,GNG12,EIF4EBP1,PRKCA
HMGB1 SIGNALING	1.69	7.52x10-2	-1	PIK3R3,VCAM1,RND3,HAT1,MAPK3,TGFB2,IRS2,ELK1,SERPINE1,TNFRSF11B
MTOR SIGNALING	1.55	6.47x10-2	-1	PIK3R3,EIF3C,ULK1,RND3,MAPK3,PPM1L,EIF3J,FKBP1A,IRS2,EIF3E,EIF4G1,EIF4EBP1,PRKCA
ACTIN NUCLEATION BY ARP-WASP COMPLEX	0.861	7.14x10-2	-1	ITGB1,ITGA3,ACTR3,RND3
HIPPO SIGNALING	0.427	4.60x10-2	-1	AJUBA,PPM1L,CD44,NF2
LPS/IL-1 MEDIATED INHIBITION OF RXR FUNCTION	0.412	4.07x10-2	-1	TRAF6,IL33,CHST2,ALDH1L2,GSTM3,CYP7A1,CD14,SOD3,TNFRSF11B
SIGNALING BY RHO FAMILY GTPASES	1.79	6.45x10-2	-1.069	ITGB1,SEPT8,CFL1,MYLPF,SEPT7,CDH15,PIK3R3,PIP5K1A,ITGA3,ACTR3,RND3,MAPK3,IRS2,CDC42EP1,ELK1,GNG12
GLIOMA INVASIVENESS SIGNALING	1.92	1.00x10-1	-1.134	PIK3R3,TIMP3,RND3,MAPK3,HMMR,CD44,IRS2
CDC42 SIGNALING	0.612	4.79x10-2	-1.134	ITGB1,ITGA3,ACTR3,RALA,CFL1,Ppp1r12A,MYLPF,RASA1
NF-κB SIGNALING	0.332	3.87x10-2	-1.134	TRAF6,IL33,PIK3R3,CSNK2A2,HDAC1l,IRS2,TNFRSF11B
REGULATION OF ACTIN-BASED MOTILITY BY RHO	2.87	1.11x10-1	-1.414	ITGB1,PIP5K1A,ITGA3,ACTR3,RND3,CFL1,Ppp1r12A,WAsl,MYLPF,GSN
TGF-β SIGNALING	2.43	1.03x10-1	-1.414	TRAF6,IRF7,RNF111,MAPK3,TGFB2,SMAD6,SERPINE1,INHBA,PMEPA1
WNT/β-CATENIN SIGNALING	1.06	5.81x10-2	-1.414	SOX4,CSNK2A2,CSNK1G3,PPM1L,MARK2,CD44,TGFB2,SOX9,TCF7L1,CCND1
OSTEOARTHRITIS PATHWAY	1.14	5.71x10-2	-1.508	ITGB1,TIMP3,ITGA3,SPP1,DDR2,SMAD6,CTNNA1,SOX9,WISP1,TCF7L1,JAG1,CREB5
Ration: Number of differential genes contained in the "molecule" column/ number of all genes in the pathway
